# Supplementary material for: Development of a customised data management system for a COVID-19-adapted colorectal cancer pathway
Source: HighWire-hosted journal article supplement (doi:10.1136/bmjhci-2020-100307), 2021-07-01
Supplement: bmjhci-2020-100307supp001_data_supplement.pdf [file bmjhci-2020-100307supp001_data_supplement.pdf]

Supplementary figure 1 UserForm interface

The image shows a Microsoft Word document with a form titled "UserForm1" overlaid. The form is designed for data entry and includes the following sections and fields:

- Identification:** UHPI (text box), CHI (text box).
- Actions:** Clear Form (green button), Update (yellow button), Search and Display (grey button), New Patient (teal button), Exit (red button).
- Demographics:** Age (text box), Gender (dropdown), Pathway (dropdown), Date (calendar icon), Route (dropdown).
- Consultant:** Consultant (dropdown), Comment (text box).
- Flow of patient:**
  - 1st\_test, 2nd\_test, 3rd\_test (dropdowns)
  - 1st\_status, 2nd\_status, 3rd\_status (dropdowns)
  - 1st\_date, 2nd\_date, 3rd\_date (text boxes)
  - 1st\_Personnel, 2nd\_Personnel, 3rd\_Personnel (dropdowns)
  - 1st\_Letter, 2nd\_Letter, 3rd\_Letter (dropdowns)
- qFIT:**
  - 1st: Collection date, Results date, Results (text boxes)
  - 2nd: Collection date, Results date, Results (text boxes)
  - 3rd: Collection date, Results date, Results (text boxes)
- CT:** Appt date (text box), Status (dropdown), Result (dropdown).
- End of pathway:** Date1, Letter1 (dropdown), Date2, Letter2 (dropdown).
- Other:** Bespoke entry (text box), Note on TRAK (dropdown).

The form is overlaid on a Word document showing a table with columns "3rd\_inves tigation" and "3rd\_Order tus". The Word ribbon is visible at the top, showing font settings (Calibri, 11) and styles (Normal, Bad, Good).
