# Supplementary material for: Development of a customised data management system for a COVID-19-adapted colorectal cancer pathway
Source: HighWire-hosted journal article supplement (doi:10.1136/bmjhci-2020-100307), 2021-07-01

**COVID-adapted Colorectal Cancer Pathway Dashboard**

**Number of entries**

**Number of entries via categories**

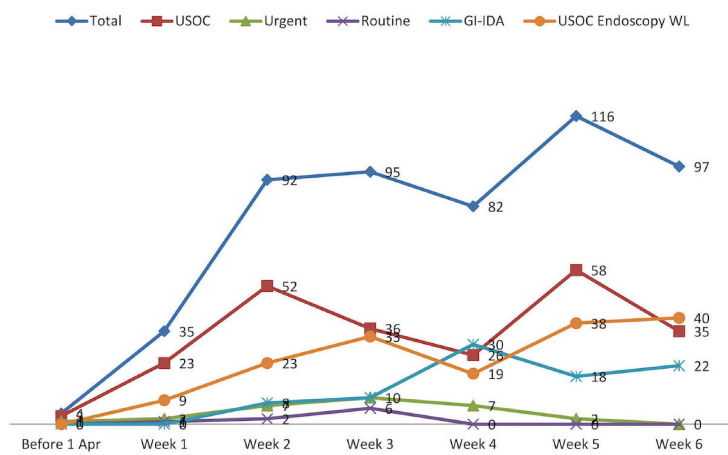

**Number of orders of investigations**

**Number of orders**

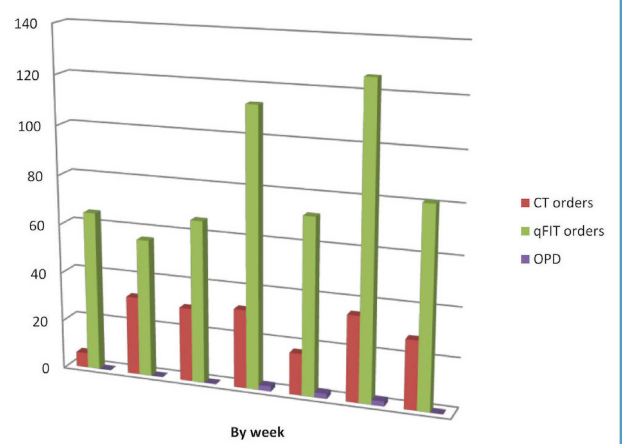

**CT: Number of orders and results**

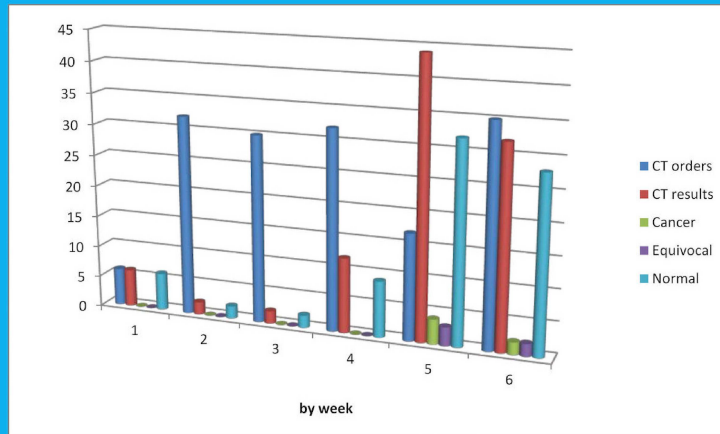

**qFIT: Number of orders and results**

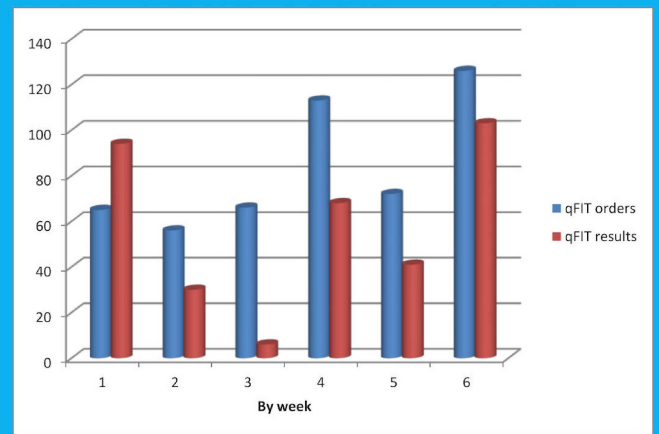

Supplement: bmjhci-2020-100307supp004_data_supplement.pdf [file bmjhci-2020-100307supp004_data_supplement.pdf]
