# Supplementary figures and images for: Development of a customised data management system for a COVID-19-adapted colorectal cancer pathway
Source: HighWire-hosted journal article supplement (doi:10.1136/bmjhci-2020-100307), 2021-07-01

**Supplementary figure 2 Overview of the data management system**

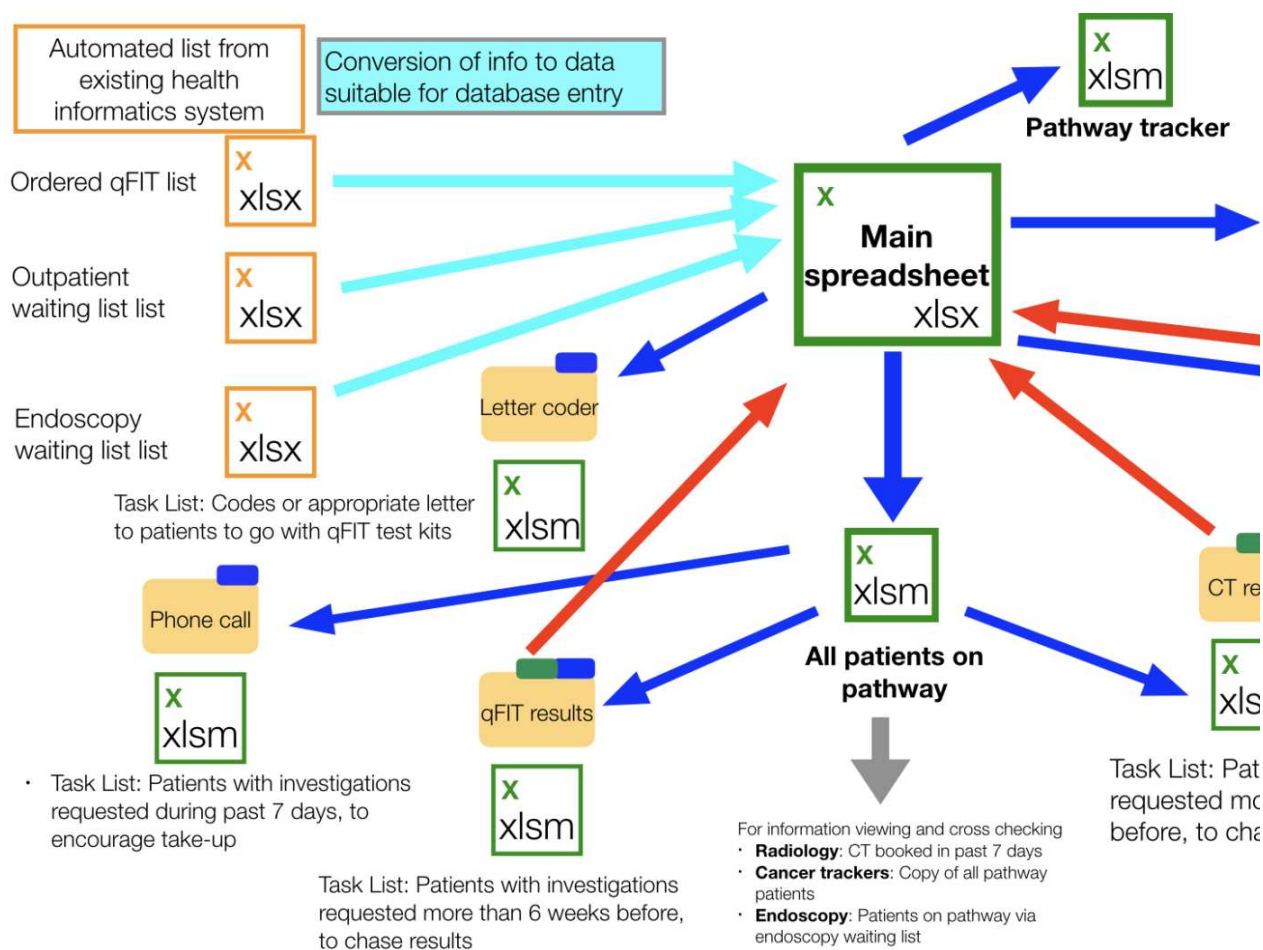

Supplement: bmjhci-2020-100307supp002_data_supplement.pdf [file bmjhci-2020-100307supp002_data_supplement.pdf]

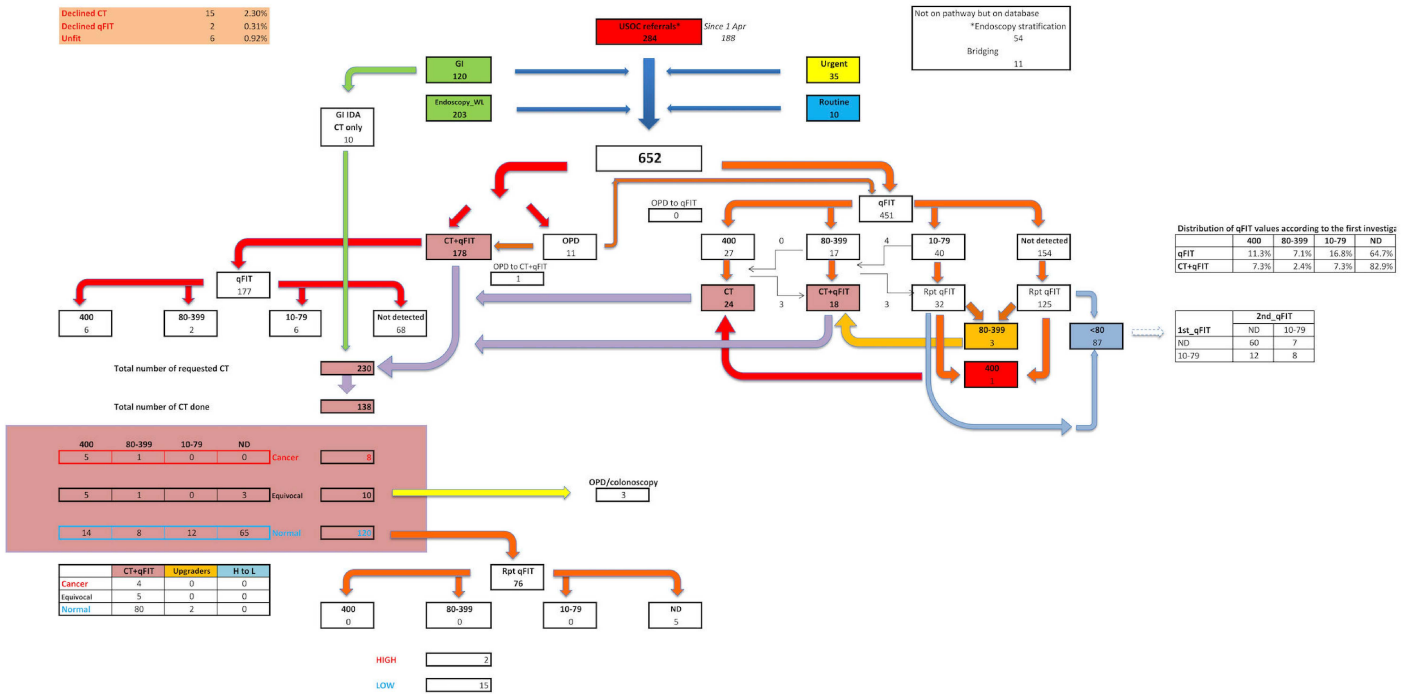

Supplement: bmjhci-2020-100307supp003_data_supplement.pdf [file bmjhci-2020-100307supp003_data_supplement.pdf]
